# Supplementary material
Source: PubMed Central journal article supplement (PMC3182738)
Supplement: 1108723108_pnas.201108723SI.pdf [file 1108723108_pnas.201108723SI.pdf]

# Supporting Information

Goswami et al. 10.1073/pnas.1108723108

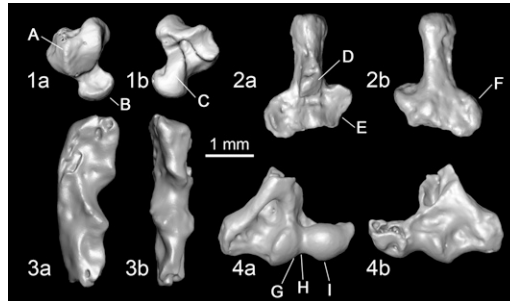

**Fig. S1.** Postcranial elements of *Deccanolestes hislopi*. 1. Astragalus (VPL/JU/NKIM/52) in dorsal (1a) and ventral (1b) views. 2. Calcaneus (VPL/JU/NKIM/50) in dorsal (2a) and ventral (2b) views. 3. Ulna (VPL/JU/NKIM/81) in medial (3a) and anterior (3b) views. 4. Humerus (VPL/JU/NKIM/79) in anterior (4a) and posterior (4b) views. Selected characters of note for phylogenetic and functional interpretations are: A, disto-medially curved lateral trochlear crest; B, rounded and extended navicular facet; C, confluence sustentacular and navicular facets; D, elongate and curved ectal facet; E, extended sustentacular facet; F, prominent peroneal tubercle; G, lateral keel of the trochlea; H, narrow zona conoidea; I, spherical capitulum (1–6).

- Boyer DM, et al. (2010) New postcrania of *Deccanolestes* from the Late Cretaceous of India and their bearing on the evolutionary and biogeographic history of euarchontan mammals. *Naturwissenschaften* 97:365–377.
- Prasad GVR, Jaeger J-J, Sahni A, Gheerbrant E, Khajuria CK (1994) Eutherian mammals from the Upper Cretaceous (Maastrichtian) intertrappean beds of Naskal, Andhra Pradesh, India. *J Vertebr Paleontol* 14:260–277.
- Prasad GVR, et al. (2010) First mammal evidence for the Late Cretaceous of India for biotic dispersal between India and Africa at the K/T transition. *C R Palevol* 9:63–71.
- Hooker JJ (2001) Tarsals of the extinct insectivoran family Nyctitheriidae (Mammalia): Evidence for archontan relationships. *Zool J Linn Soc* 132:501–529.
- Smith T, De Bast E, Sigé B (2010) Euarchontan affinity of Paleocene Afro-European adapisoriculid mammals and their origin in the late Cretaceous Deccan Traps of India. *Naturwissenschaften* 97:417–422.
- Gheerbrant E (1995) Les mammifères Paléocènes du Bassin d'Ouarzazate (Maroc). III. Adapisoriculidae et autres mammifères (Carnivora? Creodonta, Condylarthra? Ungulata et incertae sedis) [Paleocene mammals of the Ouarzazate Basin (Morocco). III. Adapisoriculidae and other mammals (Carnivora? Creodonta, Condylarthra? Ungulata and incertae sedis)]. *Palaeontogr Abt A Palaeozool-Stratigr*, 237:37–132. French.

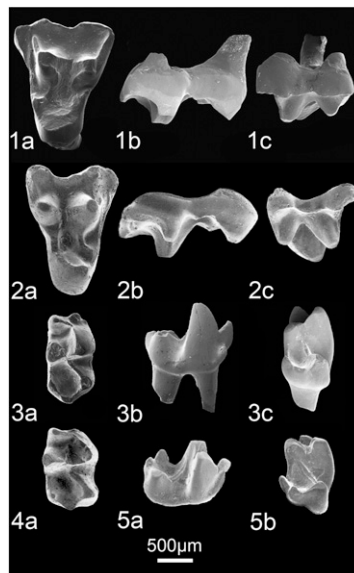

**Fig. S2.** Comparison of *Deccanolestes* and *Afrodon* dentition. 1. Left M1 of *D. hislopi* (VPL/JU/IM/17) in occlusal (1a), posterior (1b), and labial (1c) views. 2. Right M2 of *Afrodon germanicus* (CR-19-Bn) in occlusal (2a), posterior (2b), and labial (2c) views. 3. Right m1 or m2 of *D. narmadensis* (VPL/JU/IM/8, holotype) in occlusal (3a), labial (3b), and posterior (3c) views. 4a. Right m2 of *A. germanicus* (CR-1-Bn) in occlusal view. 5. Right m1 of *A. germanicus* (Wa/16118B) in labial (5a) and posterior (5b) views. Modified from Prasad et al. (1).

- Prasad GVR, et al. (2010) First mammal evidence for the Late Cretaceous of India for biotic dispersal between India and Africa at the K/T transition. *C R Palevol* 9:63–71.



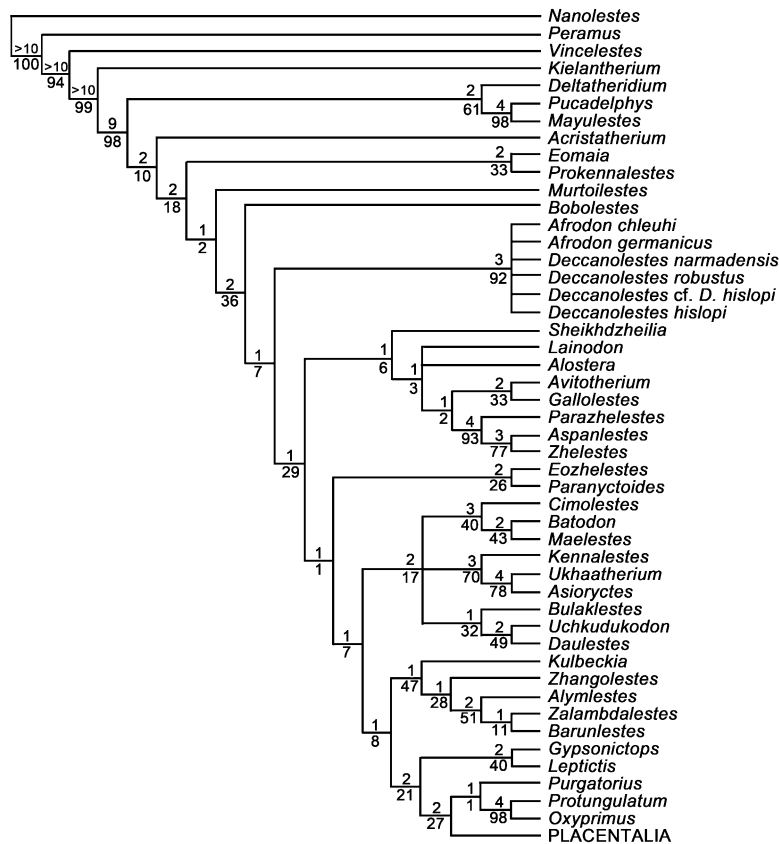

Fig. S4. Bootstrap and Bremer branch support indices. Support indices are displayed for Crown Constraint 1 (Exafroplacentalia topology, Fig. 1). Bremer support indices are located above branches; bootstrap supports are located below branches. Bootstrap analysis was conducted using TNT (5,000 replicates for each analysis). Bremer branch supports were generated from 50,000 suboptimal trees up to 10 steps longer than the most parsimonious tree.

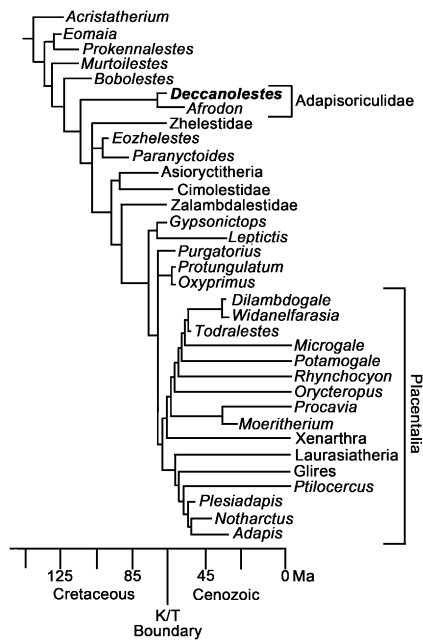

Fig. S5. Relationships of *Deccanolestes* to other eutherians using Crown Constraint 2 (Atlantogenata). Simplified reduced strict consensus tree with the crown group constrained to an Atlantogenata + Boreoeutheria topology. Positions of terminal branches indicate the age of last known occurrence of the respective taxon.

**Table S1. List of specimens used to code characters for species of *Deccanolestes*, *Kharmarungulatum*, and *Afrodon***

| Species                           | Specimens                                                                                                                                                                                                                                                                      |
|-----------------------------------|--------------------------------------------------------------------------------------------------------------------------------------------------------------------------------------------------------------------------------------------------------------------------------|
| <i>Deccanolestes hislopi</i>      | Dental/Mandibular: VPL/JU/NKIM10, VPL/JU/NKIM11, VPL/JU/NKIM15, VPL/JU/NKIM16, VPL/JU/NKIM12, VPL/JU/NKIM17, VPL/JU/NKIM18, VPL/JU/NKIM54, VPL/JU/NKIM57<br>Postcranial: VPL/JU/NKIM50, VPL/JU/NKIM52, VPL/JU/NKIM53, VPL/JU/NKIM79, VPL/JU/NKIM81, VPL/JU/NKIM82, VPL/JU/IM40 |
| <i>Deccanolestes cf hislopi</i>   | VPL/JU/IM4, VPL/JU/IM5, VPL/JU/IM11, VPL/JU/IM14, VPL/JU/IM15, VPL/JU/IM16, VPL/JU/IM17                                                                                                                                                                                        |
| <i>Deccanolestes robustus</i>     | VPL/JU/NKIM13, VPL/JU/NKIM14, VPL/JU/NKIM55                                                                                                                                                                                                                                    |
| <i>Deccanolestes narmadensis</i>  | VPL/JU/IM6, VPL/JU/IM7, VPL/JU/IM8                                                                                                                                                                                                                                             |
| <i>Kharmarungulatum vanvaleni</i> | VPL/JU/IM31                                                                                                                                                                                                                                                                    |
| <i>Afrodon germanicus</i>         | UMLH-Wa/383, MNHM.F.CR19-Bn, MNHN.F.CR181-Ph                                                                                                                                                                                                                                   |
| <i>Afrodon chleuhi</i>            | UM2 THR161 (holotype), UM2 THR51, UM2 THR149, UM2 THR168, UM2 THR176, UM2 THR 197, UM2 THR214, UM2 THR219                                                                                                                                                                      |

Institutional abbreviations: VPL/JU/IM, Vertebrate Paleontology Laboratory, University of Jammu, intertrappean mammal catalog numbers; VPL/JU/NKIM, Vertebrate Paleontology Laboratory, University of Jammu, Naskal intertrappean mammal catalog number; UM2 THR, Adrar Mgorn1 collections of the Université des sciences et techniques du Languedoc, Montpellier II catalog numbers; MNHN.F, Muséum national d'Histoire naturelle, Paris; CR, Cernay collection in MNHN; Bn, Braillon collection in MNHN; Ph, Phélizon collection in the MNHN; UMLH-Wa, Walbeck collection of the Geologisch-Paläontologisches Institut, Halle, Germany.

**Table S2. List of synapomorphies supporting key nodes A to D, shown in Fig. 2**

| Character (and state)                                                                                                                                                                                                                                                                                                                                                                     | Character description                                                                         | Character state description                                                                |
|-------------------------------------------------------------------------------------------------------------------------------------------------------------------------------------------------------------------------------------------------------------------------------------------------------------------------------------------------------------------------------------------|-----------------------------------------------------------------------------------------------|--------------------------------------------------------------------------------------------|
| Node A: Characters uniting <i>Deccanolestes</i> and <i>Afrodon</i>                                                                                                                                                                                                                                                                                                                        |                                                                                               |                                                                                            |
| 76 (0)                                                                                                                                                                                                                                                                                                                                                                                    | Deep ectoflexus                                                                               | Present only on penultimate molar                                                          |
| 86 (0)                                                                                                                                                                                                                                                                                                                                                                                    | Postprotocrista                                                                               | Extends to midlingual surface of metacone                                                  |
| 87 (0)                                                                                                                                                                                                                                                                                                                                                                                    | Development of postvallum shear                                                               | Present but only by the first rank: postmetacrista                                         |
| 111 (0)                                                                                                                                                                                                                                                                                                                                                                                   | Trigonid configuration                                                                        | Open, with paraconid anteromedial, paracristid-protocristid angle more than 50°            |
| 118 (1)                                                                                                                                                                                                                                                                                                                                                                                   | Anteroposterior shortening at base of trigonid relative to talonid                            | Some shortening (50–75% of tooth length)                                                   |
| 121 (2)                                                                                                                                                                                                                                                                                                                                                                                   | Hypoconulid of ultimate molar                                                                 | Posteriorly procumbent                                                                     |
| 123 (1)                                                                                                                                                                                                                                                                                                                                                                                   | Postcristid (between entoconid and hypoconulid) taller than hypoconulid and nearly transverse | Present                                                                                    |
| 401 (1)                                                                                                                                                                                                                                                                                                                                                                                   | Calcaneal sustentacular facet expanded onto body                                              | Present                                                                                    |
| 403 (1)                                                                                                                                                                                                                                                                                                                                                                                   | Calcaneal plantar tubercle                                                                    | Present, at distal margin                                                                  |
| 408 (1)                                                                                                                                                                                                                                                                                                                                                                                   | Deep groove for tendon of flexor fibularis on calcaneum                                       | Present                                                                                    |
| 409 (1)                                                                                                                                                                                                                                                                                                                                                                                   | Lateral keel of humerus                                                                       | Present                                                                                    |
| 410 (1)                                                                                                                                                                                                                                                                                                                                                                                   | Humerus, zona conoidea                                                                        | Present, narrow                                                                            |
| 415 (1)                                                                                                                                                                                                                                                                                                                                                                                   | Plantar pit on calcaneal cuboid facet                                                         | Present                                                                                    |
| Node B: Characters that unite Adapisoriculidae with the clade including crown placentals (as well as most other Late Cretaceous eutherians), to the exclusion of <i>Acristatherium</i> , <i>Eomaia</i> , <i>Prokennalestes</i> , <i>Murtoilestes</i> , and <i>Bobolestes</i>                                                                                                              |                                                                                               |                                                                                            |
| 57 (1)                                                                                                                                                                                                                                                                                                                                                                                    | Ultimate lower premolar talonid                                                               | As wide as anterior portion of crown                                                       |
| 79 (1)                                                                                                                                                                                                                                                                                                                                                                                    | Metacone and paracone bases                                                                   | Separated                                                                                  |
| 117 (1)                                                                                                                                                                                                                                                                                                                                                                                   | Trigonid height relative to talonid height                                                    | Less than twice                                                                            |
| 398 (2)                                                                                                                                                                                                                                                                                                                                                                                   | Ectal (or posterior calcaneoastagalal facet) longest dimension                                | Posteromedial to anterolateral                                                             |
| 404 (1)                                                                                                                                                                                                                                                                                                                                                                                   | Tuber calcis ventral curvature                                                                | Absent (1)                                                                                 |
| 406 (1)                                                                                                                                                                                                                                                                                                                                                                                   | Orientation of ML axis of cuboid facet on calcaneum relative to long axis of calcaneum        | ~70–80°                                                                                    |
| Node C: Characters that exclude <i>Deccanolestes</i> + <i>Afrodon</i> from the clade including crown placentals (as well as most other Late Cretaceous eutherians). Note that this list pertains to only the node immediately following the divergence of the adapisoriculid branch. Many other characters at other nodes may thus also exclude this clade from a more crownward position |                                                                                               |                                                                                            |
| 41 (0)                                                                                                                                                                                                                                                                                                                                                                                    | Ultimate upper premolar metacone                                                              | Absent                                                                                     |
| 65 (1)                                                                                                                                                                                                                                                                                                                                                                                    | Size (labiolingual width) of upper molar labial styler shelf at maximum                       | Less than 50% but more than 25%                                                            |
| 70 (0)                                                                                                                                                                                                                                                                                                                                                                                    | Styler cusp A                                                                                 | Subequal to larger than B                                                                  |
| 80 (0)                                                                                                                                                                                                                                                                                                                                                                                    | Preparacrista                                                                                 | Strong, from side of paracone to stylocone                                                 |
| 415 (1)                                                                                                                                                                                                                                                                                                                                                                                   | Plantar pit on calcaneal cuboid facet                                                         | Present                                                                                    |
| Node D: Characters supporting the hypothesized relationship of Adapisoriculidae with Euarchonta (Node D) in the constrained analysis                                                                                                                                                                                                                                                      |                                                                                               |                                                                                            |
| 62 (1)                                                                                                                                                                                                                                                                                                                                                                                    | Size of molar series                                                                          | Posterior increase (although <i>Ptilocercus</i> has state 0)                               |
| 88 (2)                                                                                                                                                                                                                                                                                                                                                                                    | Paraconule                                                                                    | Prominent, midway or closer to paracone (although <i>Ptilocercus</i> has retained state 0) |
| 113 (0)                                                                                                                                                                                                                                                                                                                                                                                   | Protocristid orientation                                                                      | Oblique                                                                                    |
| 375 (0)                                                                                                                                                                                                                                                                                                                                                                                   | Size of lesser trochanter of femur                                                            | Large                                                                                      |
| 389 (1)                                                                                                                                                                                                                                                                                                                                                                                   | Sustentacular and navicular facets of astragalus contact                                      | Present                                                                                    |
| 395 (0)                                                                                                                                                                                                                                                                                                                                                                                   | Astragal canal                                                                                | Present (although <i>Ptilocercus</i> displays state 2)                                     |
| 401 (1)                                                                                                                                                                                                                                                                                                                                                                                   | Calcaneal sustentacular facet expanded onto body                                              | Present                                                                                    |
| 407 (0)                                                                                                                                                                                                                                                                                                                                                                                   | Proportions of cuboid facet on calcaneum                                                      | Facet much deeper (dorsoventral) than wide (mediolateral) (although Primates have state 2) |
| 408 (1)                                                                                                                                                                                                                                                                                                                                                                                   | Deep groove for tendon of flexor fibularis on calcaneum                                       | Present (although <i>Ptilocercus</i> displays state 0)                                     |
| 409 (1)                                                                                                                                                                                                                                                                                                                                                                                   | Lateral keel of humerus                                                                       | Present                                                                                    |
| 410 (1)                                                                                                                                                                                                                                                                                                                                                                                   | Humerus, zona conoidea                                                                        | Present, narrow                                                                            |
| 411 (1)                                                                                                                                                                                                                                                                                                                                                                                   | Humerus, capitulum shape                                                                      | Spherical (1)                                                                              |
| 415 (1)                                                                                                                                                                                                                                                                                                                                                                                   | Plantar pit on calcaneal cuboid facet                                                         | Present                                                                                    |

Unless otherwise noted, all dental traits refer to the penultimate molar.

## Other Supporting Information Files

[SI Appendix \(DOC\)](#)
